# Supplementary material
Source: Research Square preprint supplement (doi:10.21203/rs.3.rs-8885816/v1)
Supplement: Supplementary file 1 [file d179996ee9fcfd27a109c78c.docx]

**Supplementary Table 1.** STROBE Statement—Checklist of items that should be included in reports of cohort studies

|  | Item No | Recommendation | Lines in manuscript |
| --- | --- | --- | --- |
| **Title and abstract** | 1 | (*a*) Indicate the study’s design with a commonly used term in the title or the abstract | indicated in the title |
| (*b*) Provide in the abstract an informative and balanced summary of what was done and what was found | The abstract includes a structured summary of the background, methods, results and conclusion |
| Introduction | | |  |
| Background/rationale | 2 | Explain the scientific background and rationale for the investigation being reported | provided in the Introduction (lines 44–79). |
| Objectives | 3 | State specific objectives, including any prespecified hypotheses | last paragraph of the Introduction (lines 73-79). |
| Methods | | |  |
| Study design | 4 | Present key elements of study design early in the paper | described at the beginning of the Methods section (lines 81-103). |
| Setting | 5 | Describe the setting, locations, and relevant dates, including periods of recruitment, exposure, follow-up, and data collection | Study setting and time frame are detailed in lines 81-103 |
| Participants | 6 | (*a*) Give the eligibility criteria, and the sources and methods of selection of participants. Describe methods of follow-up | Inclusion/exclusion criteria and data source are detailed in lines 81-85 and Figure 1 |
| (*b*)For matched studies, give matching criteria and number of exposed and unexposed | Not applicable – no matching was performed. |
| Variables | 7 | Clearly define all outcomes, exposures, predictors, potential confounders, and effect modifiers. Give diagnostic criteria, if applicable | All variables (exposures, outcomes, confounders) are defined in lines 85-99 |
| Data sources/ measurement | 8* | For each variable of interest, give sources of data and details of methods of assessment (measurement). Describe comparability of assessment methods if there is more than one group | Source and method of measurement of each variable are provided in lines 87-96. |
| Bias | 9 | Describe any efforts to address potential sources of bias | No formal bias analysis, discussed in limitation section. |
| Study size | 10 | Explain how the study size was arrived at | lines 151–152 |
| Quantitative variables | 11 | Explain how quantitative variables were handled in the analyses. If applicable, describe which groupings were chosen and why | Quantitative variables are described with methods for transformation and grouping (lines 112-115). |
| Statistical methods | 12 | (*a*) Describe all statistical methods, including those used to control for confounding | Statistical methods are described in lines 111–152 |
| (*b*) Describe any methods used to examine subgroups and interactions | No subgroup or interaction analyses were performed. |
| (*c*) Explain how missing data were addressed | Missing data handling is noted by footnotes under tables; no imputation was performed. Importantly, for all main parameters analysed 100% of data were available and there were no missing data. |
| (*d*) If applicable, explain how loss to follow-up was addressed | Not applicable – 30-day mortality was available for all patients from national registry |
| (*e*) Describe any sensitivity analyses | Not done – discussed in limitation section |
| Results | | |  |
| Participants | 13* | (a) Report numbers of individuals at each stage of study—eg numbers potentially eligible, examined for eligibility, confirmed eligible, included in the study, completing follow-up, and analysed | Number of included patients and flowchart are presented in Figure 1. |
| (b) Give reasons for non-participation at each stage | Reasons for exclusion are described based on predefined criteria. |
| (c) Consider use of a flow diagram | A study flowchart (Figure 1) is included. |
| Descriptive data | 14* | (a) Give characteristics of study participants (eg demographic, clinical, social) and information on exposures and potential confounders | Baseline characteristics and confounders are described in Table 1. |
| (b) Indicate number of participants with missing data for each variable of interest | Missing data are indicated in table footnotes. |
| (c) Summarise follow-up time (eg, average and total amount) | Follow-up time is fixed at 30 days; ICU/hospital stay durations are reported. |
| Outcome data | 15* | Report numbers of outcome events or summary measures over time | Outcome data (mortality) are reported in Tables 2 and text (lines 198-200). |
| Main results | 16 | (*a*) Give unadjusted estimates and, if applicable, confounder-adjusted estimates and their precision (eg, 95% confidence interval). Make clear which confounders were adjusted for and why they were included | Unadjusted and adjusted HRs with 95% CIs are provided in lines 209-219 |
| (*b*) Report category boundaries when continuous variables were categorized | Categories for continuous variables are reported (e.g. SOFA). |
| (*c*) If relevant, consider translating estimates of relative risk into absolute risk for a meaningful time period | Absolute risk was not calculated; |
| Other analyses | 17 | Report other analyses done—eg analyses of subgroups and interactions, and sensitivity analyses | Other analyse are presented in lines 220-231 |
| Discussion | | |  |
| Key results | 18 | Summarise key results with reference to study objectives | Key findings are summarized in the first paragraph of the Discussion |
| Limitations | 19 | Discuss limitations of the study, taking into account sources of potential bias or imprecision. Discuss both direction and magnitude of any potential bias | Study limitations are discussed in detail in the Limitations section |
| Interpretation | 20 | Give a cautious overall interpretation of results considering objectives, limitations, multiplicity of analyses, results from similar studies, and other relevant evidence | Interpretation considers objectives, existing literature, and clinical relevance are presented in Discussion section |
| Generalisability | 21 | Discuss the generalisability (external validity) of the study results | Generalizability and need for external validation are addressed in limitation section |
| Other information | | |  |
| Funding | 22 | Give the source of funding and the role of the funders for the present study and, if applicable, for the original study on which the present article is based | Funding statement included: 'This research received no external funding' (line 300). |

*Give information separately for exposed and unexposed groups.

**Note:** An Explanation and Elaboration article discusses each checklist item and gives methodological background and published examples of transparent reporting. The STROBE checklist is best used in conjunction with this article (freely available on the Web sites of PLoS Medicine at http://www.plosmedicine.org/, Annals of Internal Medicine at http://www.annals.org/, and Epidemiology at http://www.epidem.com/). Information on the STROBE Initiative is available at http://www.strobe-statement.org.

**Supplementary Table S2.** Post hoc pairwise comparisons across NT-proBNP × hs-cTnT patterns

| **Variable** | **Comparison** | **Z** | **p (unadjusted)** | **p (Holm-adjusted)** |
| --- | --- | --- | --- | --- |
| **Lactate, mmol/L** | High NT-proBNP / High hs-cTnT vs Low NT-proBNP / Low hs-cTnT | 5.18 | <0.001 | <0.001 |
|  | Low NT-proBNP / High hs-cTnT vs Low NT-proBNP / Low hs-cTnT | 4.46 | <0.001 | <0.001 |
|  | High NT-proBNP / High hs-cTnT vs High NT-proBNP / Low hs-cTnT | 2.13 | 0.034 | 0.101 |
| **Arterial pH** | High NT-proBNP / High hs-cTnT vs Low NT-proBNP / Low hs-cTnT | −4.14 | <0.001 | <0.001 |
|  | Low NT-proBNP / High hs-cTnT vs Low NT-proBNP / Low hs-cTnT | −3.78 | <0.001 | <0.001 |
| **Hemoglobin, g/dL** | High NT-proBNP / High hs-cTnT vs Low NT-proBNP / Low hs-cTnT | −4.24 | <0.001 | <0.001 |
|  | High NT-proBNP / Low hs-cTnT vs Low NT-proBNP / Low hs-cTnT | −3.93 | <0.001 | <0.001 |
| **Platelet count, ×10⁹/L** | Low NT-proBNP / High hs-cTnT vs Low NT-proBNP / Low hs-cTnT | −2.65 | 0.008 | 0.048 |
| **Creatinine, µmol/L** | High NT-proBNP / High hs-cTnT vs Low NT-proBNP / Low hs-cTnT | 11.58 | <0.001 | <0.001 |
|  | High NT-proBNP / Low hs-cTnT vs Low NT-proBNP / Low hs-cTnT | 5.36 | <0.001 | <0.001 |
| **Total bilirubin, µmol/L** | High NT-proBNP / High hs-cTnT vs Low NT-proBNP / Low hs-cTnT | 3.31 | <0.001 | 0.006 |
| **Procalcitonin, ng/mL** | High NT-proBNP / High hs-cTnT vs Low NT-proBNP / Low hs-cTnT | 8.37 | <0.001 | <0.001 |
|  | High NT-proBNP / Low hs-cTnT vs Low NT-proBNP / Low hs-cTnT | 4.79 | <0.001 | <0.001 |
| **NT-proBNP, pg/mL** | High NT-proBNP / High hs-cTnT vs Low NT-proBNP / Low hs-cTnT | 22.68 | <0.001 | <0.001 |
|  | High NT-proBNP / Low hs-cTnT vs Low NT-proBNP / Low hs-cTnT | 14.31 | <0.001 | <0.001 |
| **hs-cTnT, ng/L** | High NT-proBNP / High hs-cTnT vs Low NT-proBNP / Low hs-cTnT | 22.87 | <0.001 | <0.001 |
|  | Low NT-proBNP / High hs-cTnT vs Low NT-proBNP / Low hs-cTnT | 16.22 | <0.001 | <0.001 |
| **PaO₂/FiO₂ ratio** | High NT-proBNP / High hs-cTnT vs Low NT-proBNP / High hs-cTnT | −4.29 | <0.001 | <0.001 |
|  | Low NT-proBNP / High hs-cTnT vs Low NT-proBNP / Low hs-cTnT | 2.69 | 0.007 | 0.028 |
| **MAP, mmHg** | High NT-proBNP / High hs-cTnT vs Low NT-proBNP / Low hs-cTnT | −3.90 | <0.001 | <0.001 |
| **VIS score at admission to the ICU** | High NT-proBNP / High hs-cTnT vs Low NT-proBNP / Low hs-cTnT | 6.32 | <0.001 | <0.001 |
|  | Low NT-proBNP / High hs-cTnT vs Low NT-proBNP / Low hs-cTnT | 6.10 | <0.001 | <0.001 |
| **SOFA score** | High NT-proBNP / High hs-cTnT vs Low NT-proBNP / Low hs-cTnT | 8.40 | <0.001 | <0.001 |
| **ICU length of stay, days** | High NT-proBNP / High hs-cTnT vs Low NT-proBNP / Low hs-cTnT | −4.25 | <0.001 | <0.001 |
| **Hospital length of stay, days** | High NT-proBNP / High hs-cTnT vs Low NT-proBNP / Low hs-cTnT | −3.65 | <0.001 | 0.002 |

*Abbreviations:* hs-cTnT, high-sensitivity cardiac troponin T; ICU, intensive care unit; MAP, mean arterial pressure; NT-proBNP, N-terminal pro–B-type natriuretic peptide; PaO₂/FiO₂, arterial oxygen partial pressure to fraction of inspired oxygen fraction ratio; SOFA, Sequential Organ Failure Assessment; VIS, vasoactive–inotropic score.

Post hoc pairwise comparisons were performed using Dunn’s test with Holm correction for multiple testing. Z-statistics and adjusted p-values are shown. Only patients with complete data for each variable were included in the respective analyses. Adjusted p-values < 0.05 were considered statistically significant.
